# Supplementary material for: MMS22L-TONSL functions in sister chromatid cohesion in a pathway parallel to DSCC1-RFC
Source: PubMed Central journal article supplement (PMC9733570; doi:10.26508/lsa.202201596), 2022-12-08
Supplement: LSA-2022-01596_SdataF4.2.pdf [file LSA-2022-01596_SdataF4.2.pdf]

24h Thymidine

WT

DSCC1-ko

crOR10A7

crESCO2

crMMS22L

crOR10A7

crESCO2

crMMS22L

DNA-bound

soluble

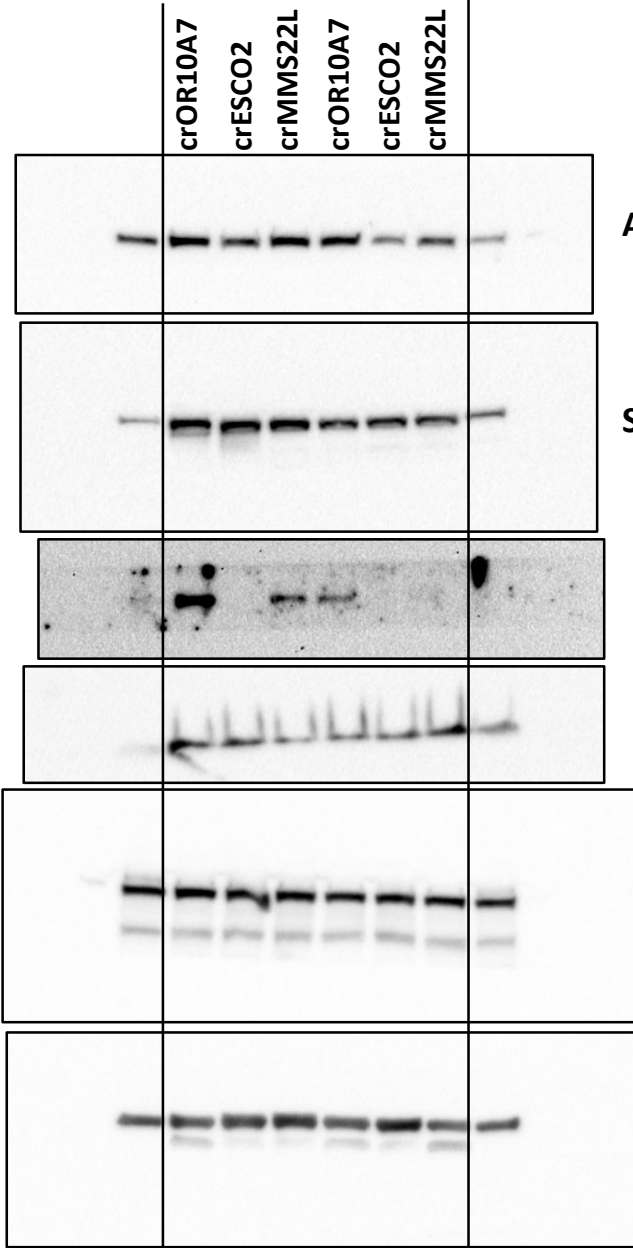

Ac-SMC3

SMC3

ESCO2

Histone H3

SMC3

Tubulin
