# Supplementary material for: MMS22L-TONSL functions in sister chromatid cohesion in a pathway parallel to DSCC1-RFC
Source: Life Sci Alliance. 2022 Dec 8;6(2):e202201596. doi: 10.26508/lsa.202201596 (PMC9733570; doi:10.26508/lsa.202201596)
Supplement: Supplementary file 1 [file LSA-2022-01596_SdataF1.xlsx]

## Sheet: Fig 1A
			Percentage of metaphases
Experiment	Cell line	Normal (0-4 rr)	Railroad (≥ 5 rr)	Premature separation
1	WT	98	0	2
1	DSCC1-KO	63	2	35
2	WT	94	0	6
2	DSCC1-KO	46	23	31
3	WT	91	0	9
3	DSCC1-KO	54	13	33

## Sheet: Fig 1B
DNA replication fork speed (kb/min)
Experiment 1		Experiment 2
WT	DSCC1-KO	WT	DSCC1-KO
0.51	0.16	0.36	0.24
0.66	0.25	0.39	0.29
0.77	0.27	0.54	0.3
0.78	0.27	0.67	0.35
0.78	0.27	0.69	0.35
0.8	0.3	0.71	0.37
0.82	0.31	0.74	0.37
0.83	0.33	0.74	0.39
0.86	0.35	0.77	0.4
0.87	0.35	0.89	0.4
0.89	0.46	0.89	0.41
0.9	0.47	0.89	0.42
0.9	0.49	0.9	0.43
0.91	0.5	0.91	0.43
0.91	0.5	0.91	0.44
0.92	0.52	0.91	0.44
0.97	0.53	0.92	0.45
1.01	0.53	0.92	0.46
1.02	0.53	0.93	0.47
1.02	0.54	0.93	0.47
1.03	0.54	0.96	0.47
1.04	0.54	0.99	0.48
1.07	0.54	1.01	0.49
1.08	0.55	1.01	0.5
1.1	0.56	1.01	0.52
1.11	0.56	1.01	0.53
1.11	0.56	1.02	0.55
1.11	0.57	1.05	0.56
1.12	0.57	1.07	0.57
1.14	0.57	1.08	0.58
1.14	0.58	1.1	0.58
1.15	0.58	1.1	0.59
1.15	0.58	1.12	0.59
1.17	0.58	1.15	0.59
1.17	0.58	1.16	0.6
1.19	0.59	1.16	0.6
1.19	0.59	1.16	0.62
1.19	0.59	1.17	0.62
1.2	0.6	1.17	0.62
1.23	0.6	1.19	0.62
1.26	0.6	1.21	0.63
1.27	0.61	1.21	0.64
1.28	0.62	1.21	0.64
1.28	0.63	1.23	0.65
1.31	0.63	1.25	0.66
1.31	0.64	1.25	0.66
1.32	0.64	1.26	0.67
1.33	0.64	1.27	0.68
1.36	0.64	1.29	0.68
1.36	0.65	1.29	0.68
1.41	0.65	1.29	0.69
1.44	0.65	1.31	0.69
1.44	0.65	1.31	0.69
1.45	0.66	1.31	0.7
1.49	0.67	1.34	0.72
1.5	0.67	1.34	0.73
1.5	0.67	1.34	0.73
1.58	0.67	1.34	0.73
1.62	0.68	1.35	0.74
1.63	0.68	1.35	0.74
1.63	0.69	1.36	0.74
1.63	0.69	1.36	0.74
1.66	0.7	1.36	0.76
1.73	0.7	1.36	0.76
1.86	0.7	1.36	0.76
	0.7	1.36	0.77
	0.71	1.37	0.78
	0.71	1.38	0.78
	0.71	1.4	0.78
	0.71	1.42	0.8
	0.72	1.42	0.81
	0.72	1.42	0.81
	0.73	1.42	0.81
	0.73	1.45	0.83
	0.74	1.45	0.84
	0.74	1.46	0.85
	0.74	1.47	0.85
	0.74	1.48	0.87
	0.75	1.49	0.87
	0.75	1.52	0.87
	0.76	1.52	0.88
	0.76	1.54	0.88
	0.76	1.54	0.89
	0.76	1.54	0.92
	0.77	1.54	0.93
	0.77	1.57	0.94
	0.77	1.57	0.96
	0.79	1.58	0.96
	0.79	1.63	0.97
	0.8	1.64	0.97
	0.8	1.67	0.97
	0.8	1.67	0.98
	0.8	1.68	0.98
	0.81	1.69	0.99
	0.82	1.72	1.02
	0.82	1.81	1.04
	0.82	1.82	1.05
	0.84	1.85	1.06
	0.85	2.33	1.19
	0.87	2.59	1.64
	0.9
	0.9
	0.91
	0.91
	0.92
	0.93
	0.93
	0.93
	0.96
	1
	1.05
	1.2
	1.2
	1.44

## Sheet: Fig 1C
	> 5 foci per cell (%)		Cells scored per condition
	WT	DSCC1KO	WT	DSCC1KO
Exp1	14	70	47	47
Exp2	8.51064	51.0638	47	47
Exp3	21.9178	60.7143	73	56

## Sheet: Fig 1D
			Viability relative to untreated
ATRi (AZD6738) (μM)	WT			DSCC1KO
0	1.03095	0.996873	0.972179	1.00096	1.01689	0.982155
0.4	0.897342	0.912731	0.899273	0.819846	0.84362	0.824722
0.8	0.867785	0.849286	0.845392	0.581083	0.55968	0.602387
1.6	0.633157	0.686777	0.750667	0.28375	0.261053	0.24478
3.2	0.268941	0.317912	0.316318	0.161616	0.162342	0.143444
CPT (nM)	WT			DSCC1KO
0	1.03095	0.996873	0.972179	1.00096	1.01689	0.982155
10	0.893081	0.887906	0.911816	0.375021	0.346464	0.365586
20	0.790778	0.7774	0.797442	0.262319	0.23446	0.258837
40	0.32345	0.34446	0.399648	0.314396	0.222399	0.318099
80	0.221227	0.249448	0.277775	0.330889	0.246204	0.301289
IlludinS (nM)	WT			DSCC1KO
0	0.978649	1.03271	0.988638	0.963973	0.983739	1.05229
2.5	1.06205	0.990447	1.00234	0.736274	0.683297	0.698493
5	0.940089	0.956274	0.931004	0.42584	0.432748	0.353837
10	0.562003	0.537819	0.654086	0.21355	0.192503	0.183631
20	0.138895	0.098261	0.0969491	0.075973	0.0842095	0.085538
Quarfloxin (μM)	WT			DSCC1KO
0	1.0081	0.996922	0.994976	1.01316	1.00324	0.983597
0.1	0.915376	0.92677	0.917131	0.678169	0.694432	0.659466
0.2	0.878733	0.848734	0.838556	0.47572	0.563638	0.536966
0.4	0.845089	0.76376	0.791625	0.408159	0.366397	0.409265
0.8	0.660883	0.65756	0.681378	0.258308	0.2264	0.2197
Talazoparib (μM)	WT			DSCC1KO
0	0.995311	1.02195	0.982736	1.06714	0.981997	0.950864
0.1	0.628764	0.841424	0.900651	0.42045	0.335495	0.33333
0.2	0.584671	0.757181	0.776231	0.195527	0.19867	0.178268
0.4	0.629242	0.772819	0.809612	0.131245	0.160337	0.244623
0.8	0.691345	0.812302	0.830793	0.232607	0.215561	0.275634
