# Supplementary material for: MMS22L-TONSL functions in sister chromatid cohesion in a pathway parallel to DSCC1-RFC
Source: Life Sci Alliance. 2022 Dec 8;6(2):e202201596. doi: 10.26508/lsa.202201596 (PMC9733570; doi:10.26508/lsa.202201596)
Supplement: Supplementary file 2 [file LSA-2022-01596_SdataF2.xlsx]

## Sheet: Fig 2B
GO-Term	-LOG10(FDR)
Replication fork processing	5.78516
DNA repair	6.05355
Mitotic cell cycle process	6.66756
Mitotic cell cycle	7.42481
Cell cycle	7.86646
Cellular response to DNA damage stimulus	7.99568
Cell cycle process	8.07314
DNA metabolic process	8.07314
DNA replication	11.1124
DNA-dependent DNA replication	11.2472

## Sheet: Fig 2C
			Viability relative to crOR10A7
crRNA	WT			DSCC1KO
OR10A7	1	1	1	1	1	1
POLR2L	0.0372115	0.0228059	0.033775	0.056329	0.0274998	0.055194
MMS22L	0.345526	0.436884	0.408729	0.0284803	0.0523737	0.105843
POLE3	1.16542	1.01176	1.12217	0.580559	0.336195	0.638866
DDX11	1.04539	0.919945	1.17088	0.312184	0.369263	0.318578
BLM	1.16497	0.86056	1.08948	0.498357	0.498038	0.248883
RECQL5	1.01903	0.78741	0.754858	0.377255	0.523057	0.286735
SIVA1	0.890628	0.958053	1.06374	0.379999	0.29877	1.10559
