# Supplementary material for: MMS22L-TONSL functions in sister chromatid cohesion in a pathway parallel to DSCC1-RFC
Source: Life Sci Alliance. 2022 Dec 8;6(2):e202201596. doi: 10.26508/lsa.202201596 (PMC9733570; doi:10.26508/lsa.202201596)
Supplement: Supplementary file 5 [file LSA-2022-01596_SdataF4.1.xlsx]

## Sheet: Fig 4A
			Percentage of metaphases
	Cell line:	crRNA:	Normal	Partially seperated	Single chromatids
Exp1			96.6	0	3.4
Exp2	WT	OR10A7	92.2	2	5.8
Exp3			94	2	4
Exp1			30.2	12.9	56.9
Exp2	WT	MMS22L	34.7	23.8	41.5
Exp3			4	16	80
Exp1			48.4	11	40.6
Exp2	WT	TONSL	57.2	18.4	24.5
Exp3			23	4	73
Exp1			24	22	54
Exp2	WT	DDX11	82.7	8.1	9.3
Exp3			66	8	26
Exp1			43.8	8.3	47.9
Exp2	DSCC1-KO	OR10A7	66.7	10.1	23.2
Exp3			45	7	48
Exp1			8.7	14.5	76.8
Exp2	DSCC1-KO	MMS22L	26.9	20.2	53
Exp3			7	14	79
Exp1			2.4	14.3	83.3
Exp2	DSCC1-KO	TONSL	18.2	20.5	61.3
Exp3			2	13	85
Exp1			5	5	90
Exp2	DSCC1-KO	DDX11	4.7	16.5	78.8
Exp3			11	7	82

## Sheet: Fig 4D
	Viability relative to crOR10A7
crRNA	WT			DSCC1-KO			DDX11-KO
OR10A7	1	1	1	1	1	1	1	1	1
POLR2L	0.0460516	0.0279351	0.034476	0.0625848	0.0327991	0.073447	0.0378456	0.0224745	0.056912
MMS22L	0.385787	0.37827	0.400753	0.0385496	0.0704564	0.13457	0.291985	0.206205	0.489738
TONSL	0.22554	0.341092	0.220997	0.0683732	0.0836784	0.119115	0.155827	0.086566	0.205586
ESCO2	0.534084	0.502479	0.278487	0.233038	0.215555	0.160338	0.0613285	0.108356	0.065318
